# Supplementary material
Source: PubMed Central journal article supplement (PMC4096832)
Supplement: NIHMS583460-supplement-Supplementary_Figure_S2.pdf [file NIHMS583460-supplement-Supplementary_Figure_S2.pdf]

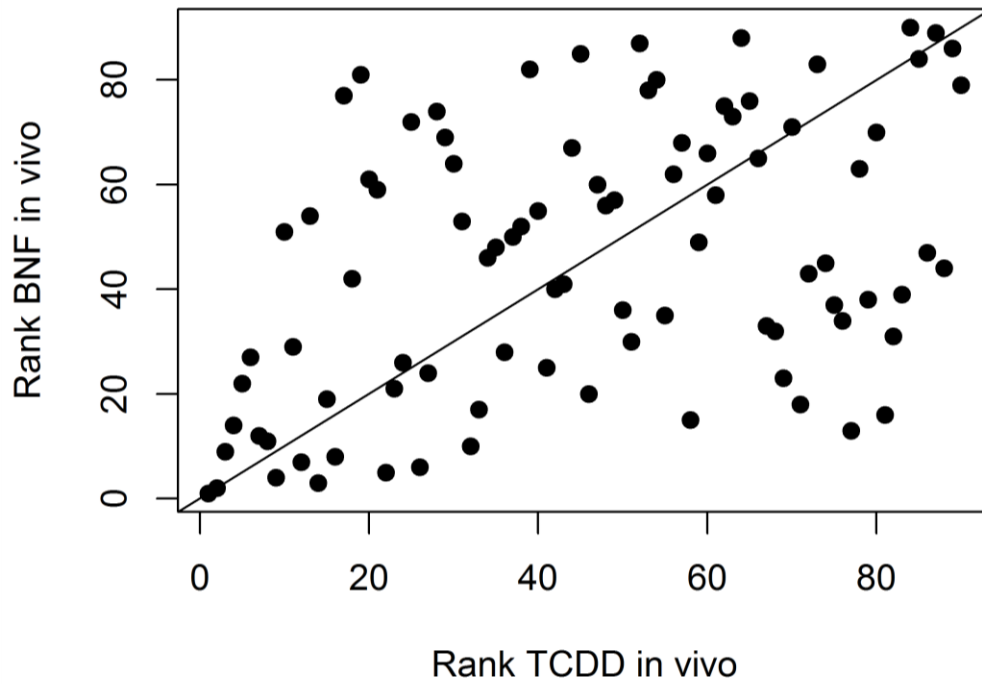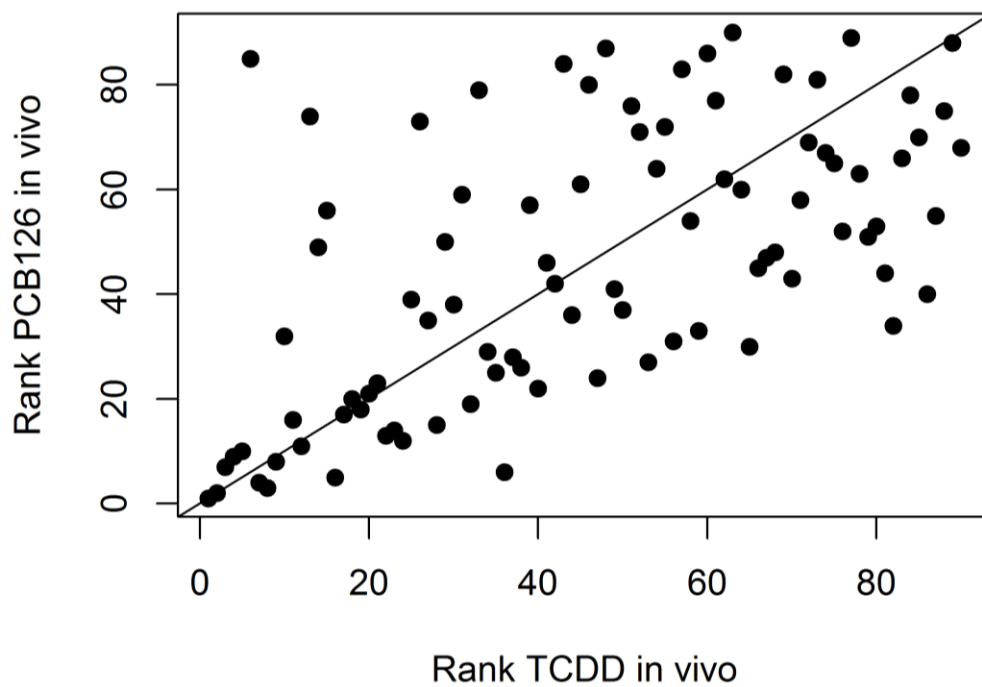

**Supplementary Figure S2.** Rank maximum |fold-change| correlation of 90 genes differentially regulated ( $|\text{fold-change}| \geq 1.5$ ,  $P_1(t) \geq 0.9999$ ) by TCDD,  $\beta$ NF, and PCB126 in mouse liver samples.
