# Supplementary material
Source: PubMed Central journal article supplement (PMC4096832)
Supplement: NIHMS583460-supplement-Supplementary_Figure_S3.pdf [file NIHMS583460-supplement-Supplementary_Figure_S3.pdf]

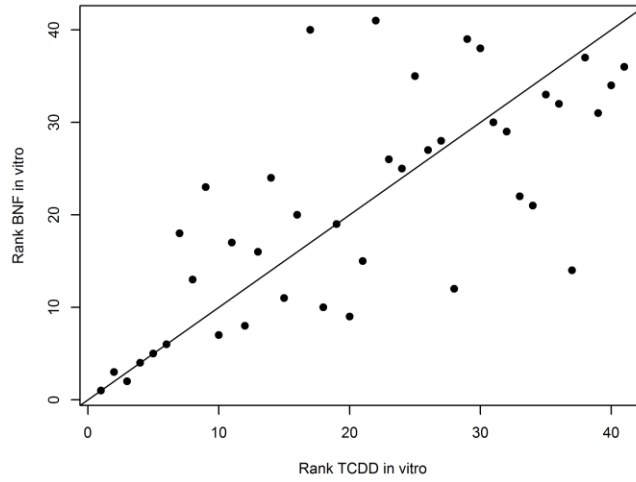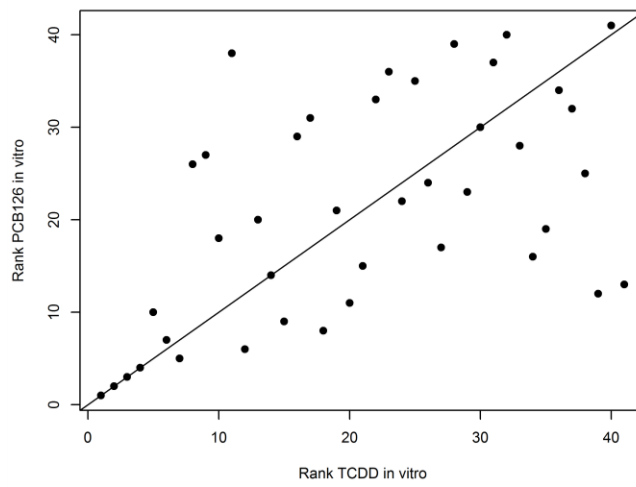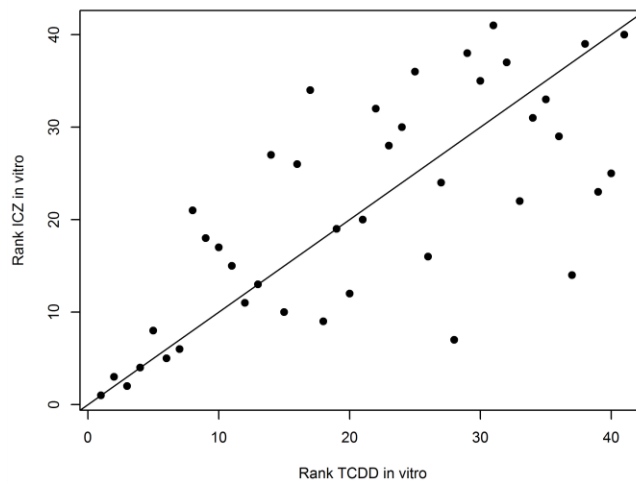

**Supplementary Figure S3.** Rank maximum |fold-change| correlation of 41 genes differentially regulated ( $|\text{fold-change}| \geq 1.5$ ,  $P_1(t) \geq 0.9999$ ) by TCDD,  $\beta$ NF, PCB126, and ICZ in Hepa1c1c7 cells.
